# Supplementary figures and images for: Complications following Nipple-Sparing Mastectomy and Immediate Acellular Dermal Matrix Implant-based Breast Reconstruction—A Systematic Review and Meta-analysis
Source: PubMed Central journal article supplement — Plast Reconstr Surg Glob Open. 2018 Jan 12;6(1):e1625. doi: 10.1097/GOX.0000000000001625 (PMC5811291; doi:10.1097/gox.0000000000001625), 2018-01-12

## Any necrosis or ischemia

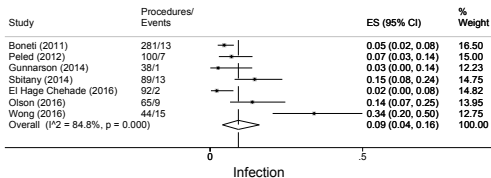

## NAC necrosis or ischemia

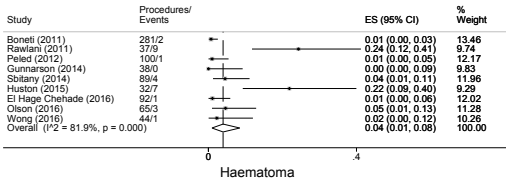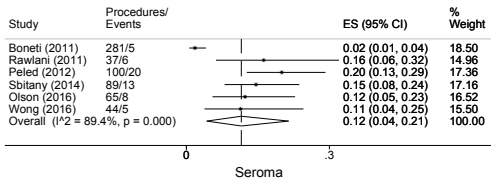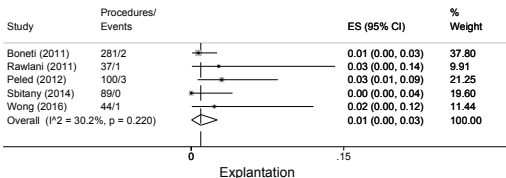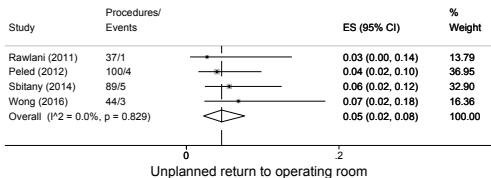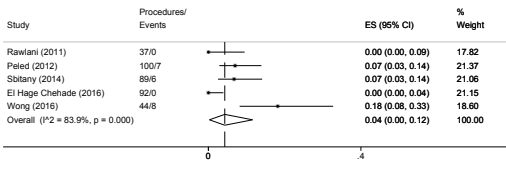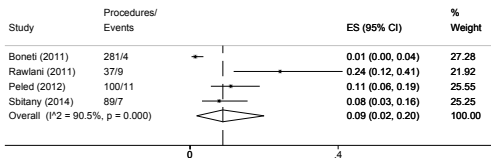

Supplement: gox-6-e1625-s001.pdf [file gox-6-e1625-s001.pdf]
